# Supplementary material for: Confined germanium nanoparticles in an N-doped carbon matrix for high-rate and ultralong-life lithium ion batteries
Source: Royal Society of Chemistry journal article supplement (doi:10.1039/c5ra17432e), 2015-01-01
Supplement: c5ra17432e1.pdf [file c5ra17432e1.pdf]

## Supporting Information

### Confined Germanium NPs in N-doped carbon matrix for High-rate and Ultralong-life Lithium Ion Batteries

Shan Fang, Laifa Shen, Hao Zheng, Zhenkun Tong, Gang Pang, and Xiaogang Zhang\*

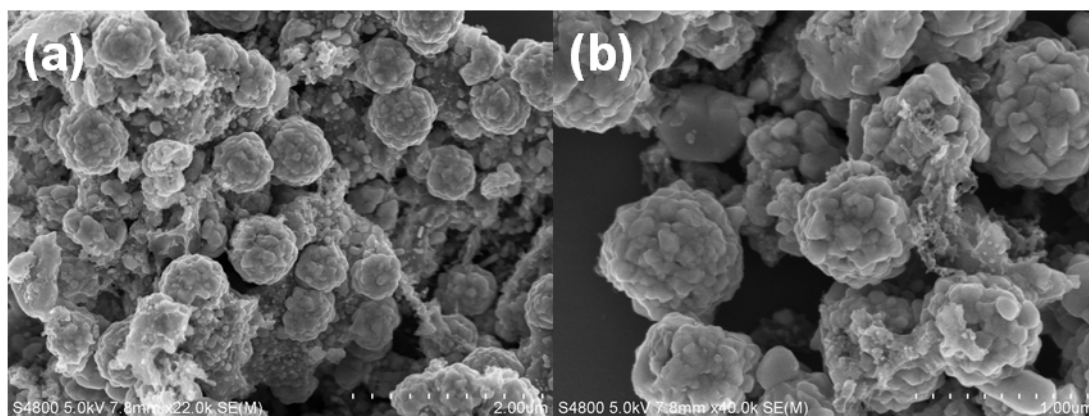

Figure S1. The SEM images of bulk Ge without adding CMK-3.

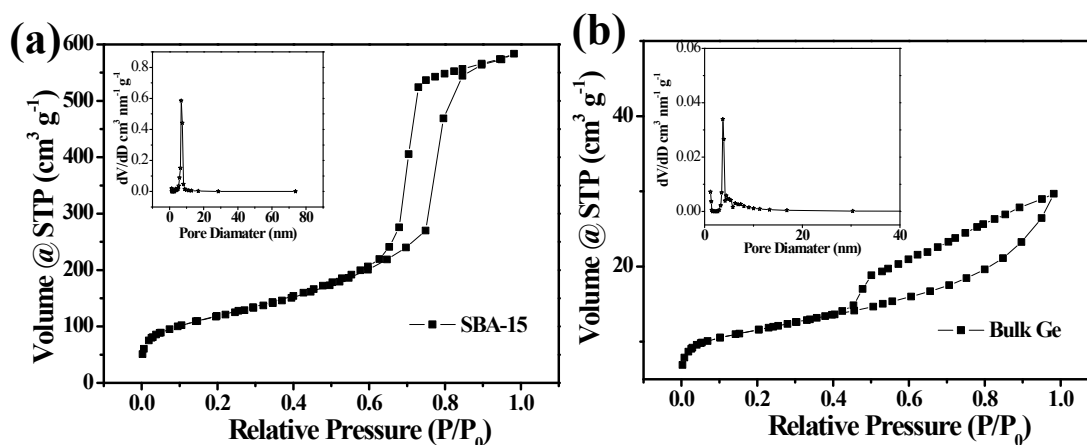

Figure S2. N<sub>2</sub> adsorption-desorption isotherm of pristine SBA-15 (a) and bulk Ge (b). The inset shows the pore size distribution calculated using the BJH method. The specific surface area is 523.49 m<sup>2</sup> g<sup>-1</sup>, mean pore diameters 6.889 nm, and pore volumes 0.936 cm<sup>3</sup> g<sup>-1</sup> of SBA-15. The surface area of bulk Ge is 42.12 m<sup>2</sup> g<sup>-1</sup>, the pore diameter is 4.06 nm and the pore volumes 0.043 cm<sup>3</sup> g<sup>-1</sup>.

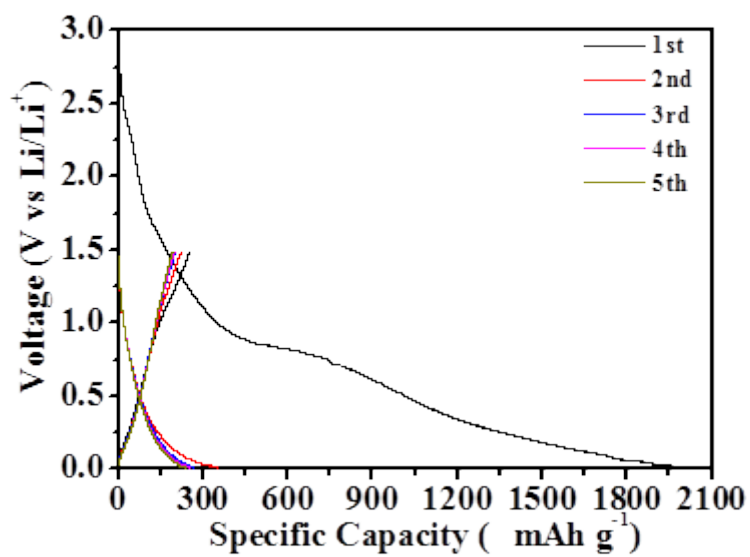

Figure S3. Charge/discharge profiles of acidulated CMK-3 nanocomposite.

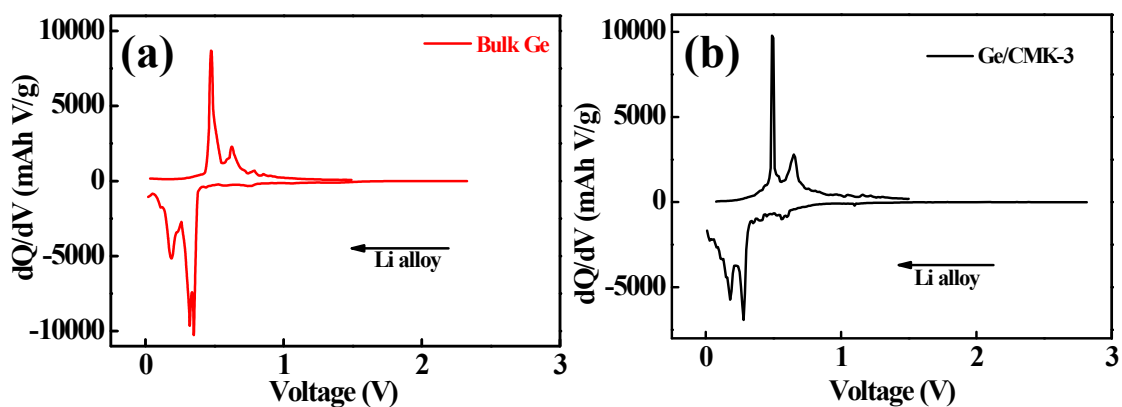

Figure S4. Differential capacity plots of bulk Ge and Ge/CMK-3 at first cycles.

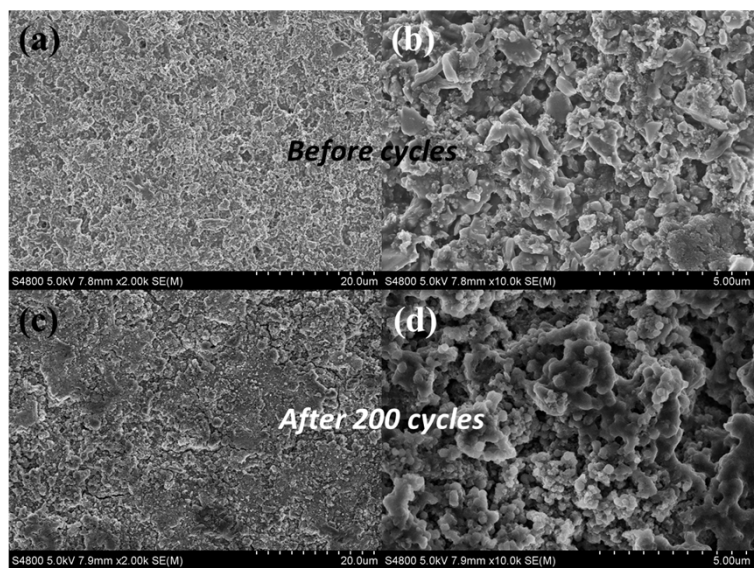

**Figure S5.** SEM images of the Ge/CMK-3 composite electrode before and after 200 charge/discharge cycles.
